# Supplementary material
Source: Springer Nature journal article supplement (https://www.springermedizin.de/resource/supplementary/12974_2010_273_MOESM1_ESM.pdf/9601138)

BV2

N9

MPM

A

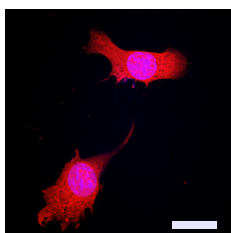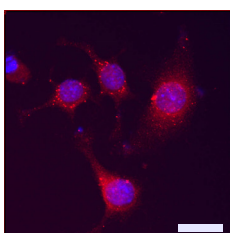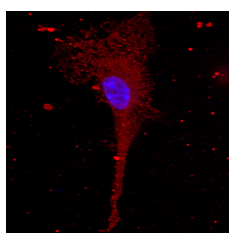

B1R

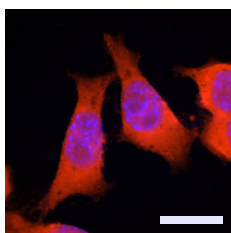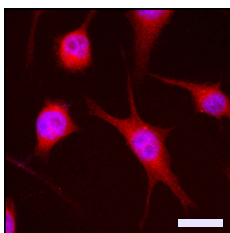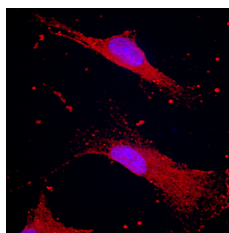

B2R

B

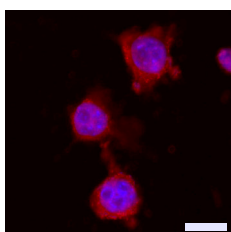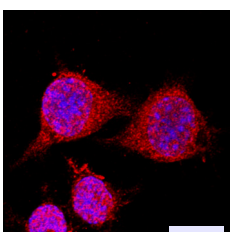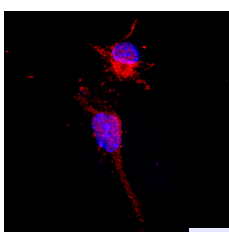

ETAR

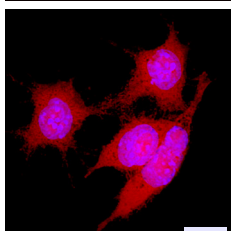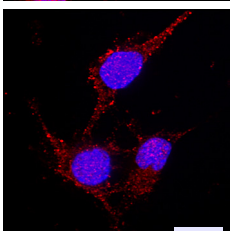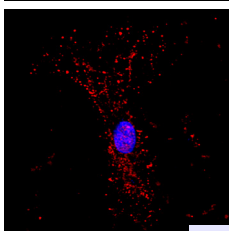

ETBR

C

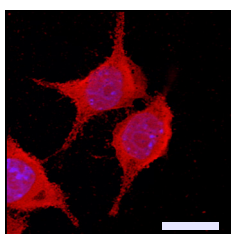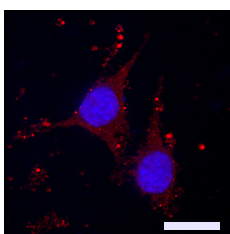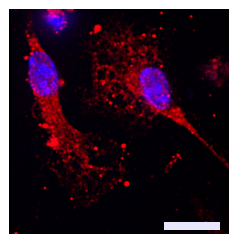

SSR-2

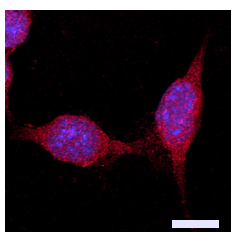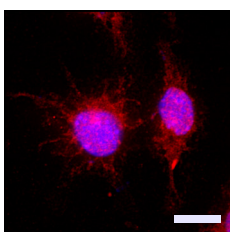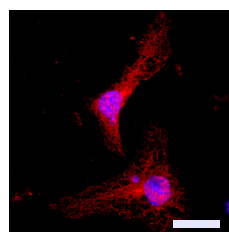

SSR-3

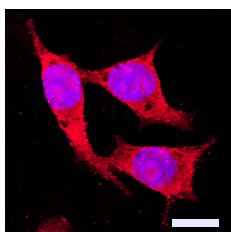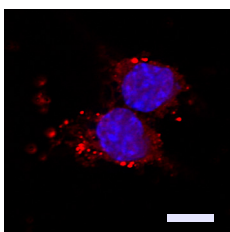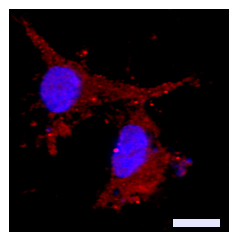

SSR-4

Supplement: MOESM1 [file 9601138]
